# Supplementary material for: Mitigation of Oxidative Damage by Green Tea Polyphenols and Tai Chi Exercise in Postmenopausal Women with Osteopenia
Source: PLoS One. 2012 Oct 31;7(10):e48090. doi: 10.1371/journal.pone.0048090 (PMC3485260; doi:10.1371/journal.pone.0048090)
Supplement: Safety and clinical outcomes S1. — (ZIP) [file pone.0048090.s003.zip]

Archive with 2 entries (2 files):
- 2010 Safty and Life Quality.pdf
- 2012 Clinical Outcomes.pdf
